# Supplementary material for: Exploitation of a simple Schiff base as a ratiometric and colorimetric chemosensor for glutamic acid
Source: Royal Society of Chemistry journal article supplement (doi:10.1039/c5ay01465d), 2015-01-01
Supplement: c5ay01465d1.pdf [file c5ay01465d1.pdf]

## Supplementary documents

# Exploitation of a simple Schiff base as a ratiometric and colorimetric chemosensor for glutamic acid

Anupam Ghorai, Jahangir Mondal, Rukmani Chandra and Goutam K Patra\*

Department of Chemistry, Guru Ghasidas Vishwavidyalaya, Bilaspur (C.G)

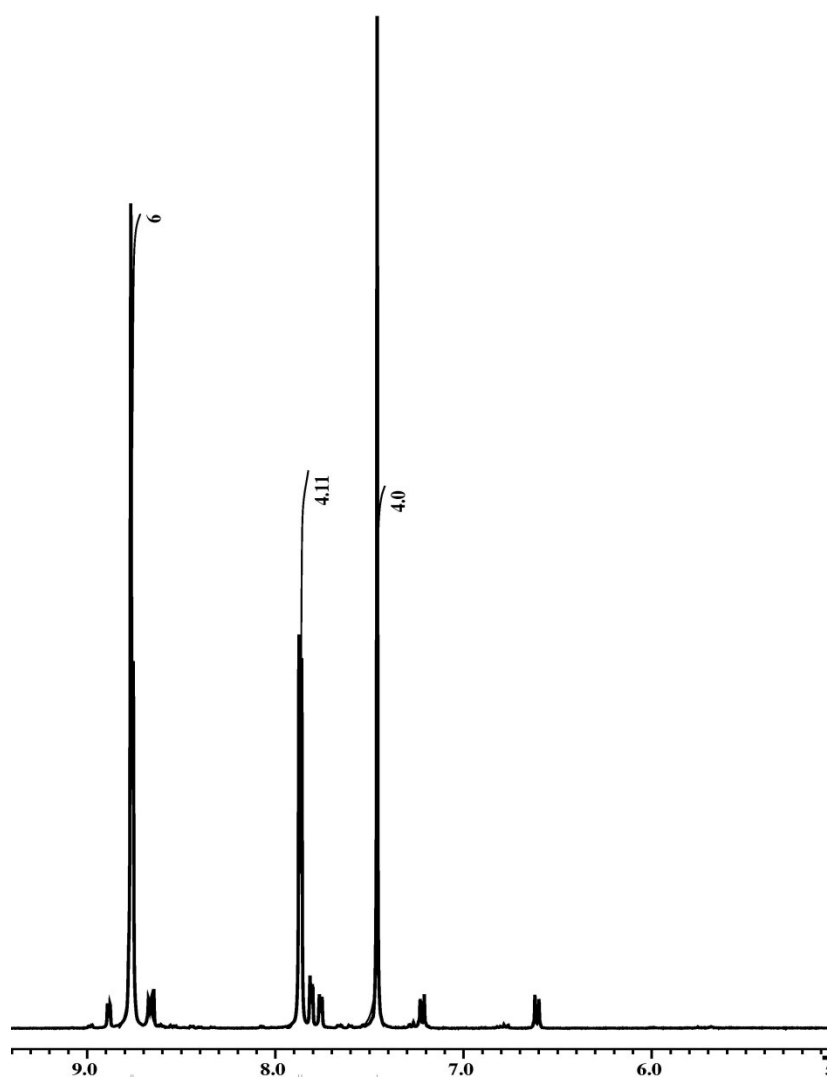

Fig. S1  $^1\text{H}$  NMR spectra of L in  $\text{d}_6\text{-DMSO}$

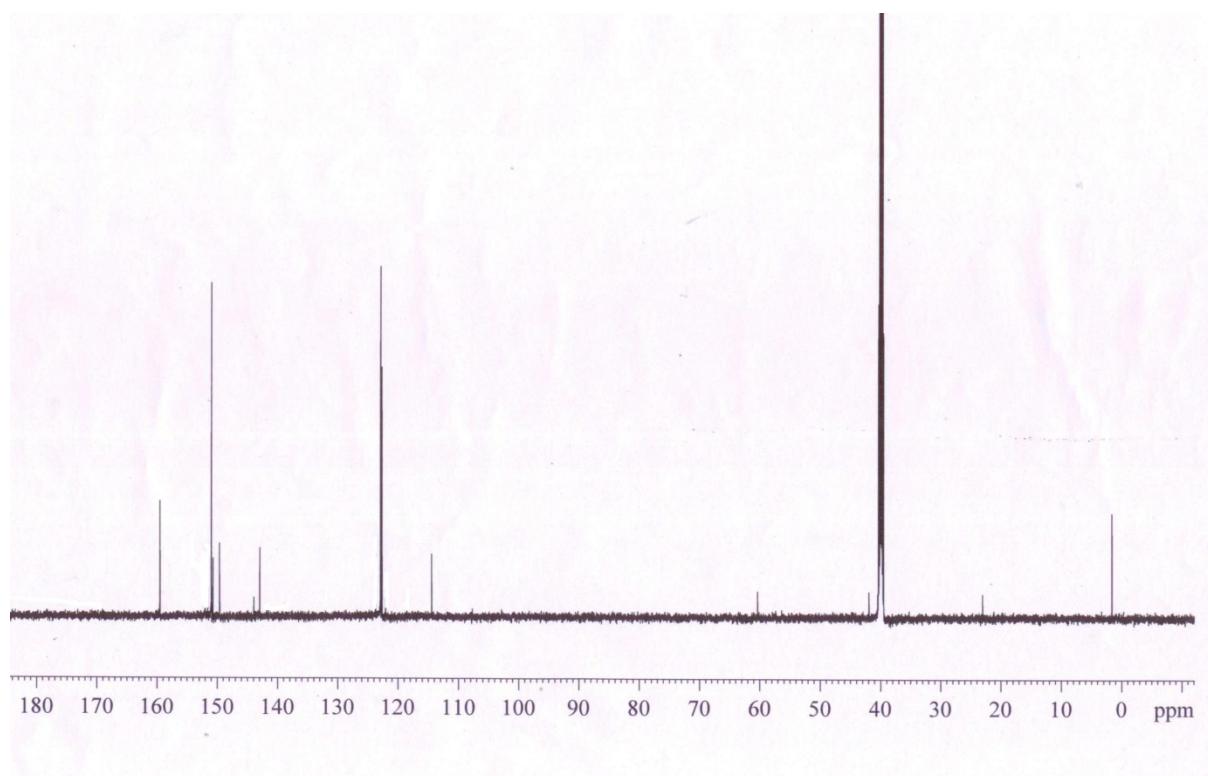

**Fig. S2**  $^{13}\text{C}$  NMR Spectra of **L** in  $\text{d}_6$ -DMSO

Comment 1

Comment 2

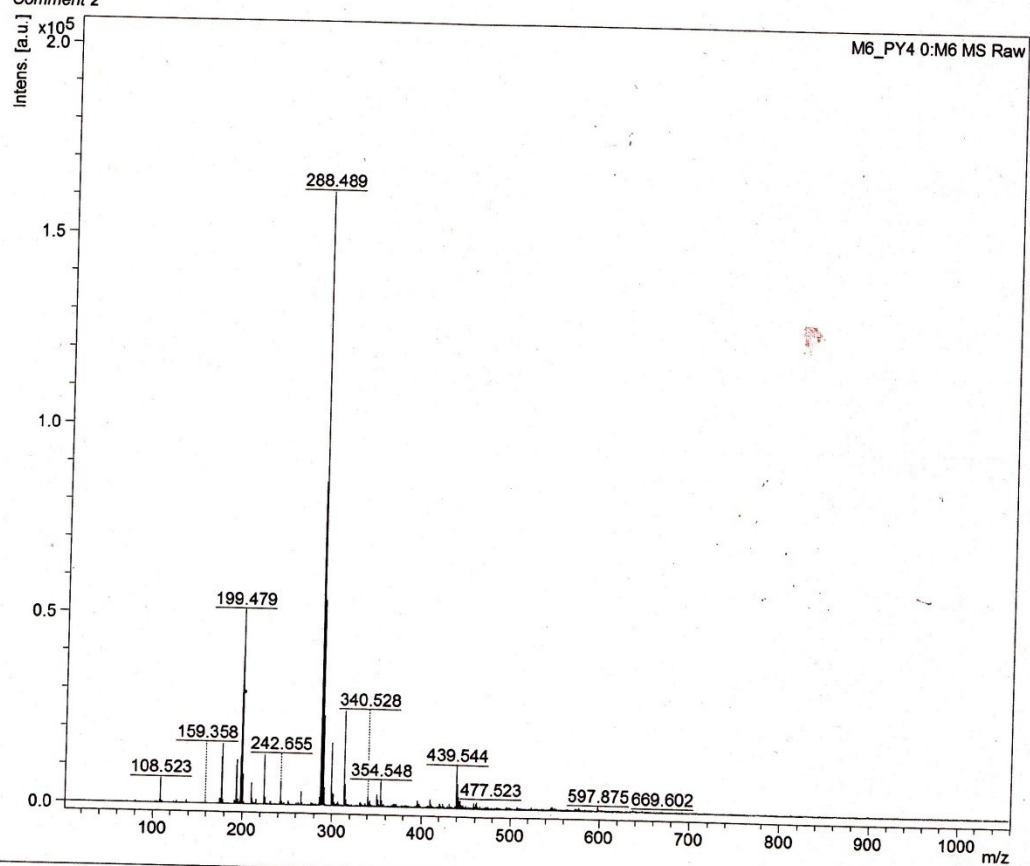

**Acquisition Parameter**

Date of acquisition 2015-01-02T17:36:10.369+05:30  
Acquisition method name D:\User Methods\Low Mass\_RP\_100-1500\_Da.par  
Acquisition operation mode Reflector  
Voltage polarity POS  
Number of shots 1000  
Name of spectrum used for calibration  
Calibration reference list used PeptideCalibStandard mono

**Instrument Info**

Bruker Daltonics flexAnalysis

printed: 1/2/2015 6:01:56 PM

Fig. S3 Mass spectra of L

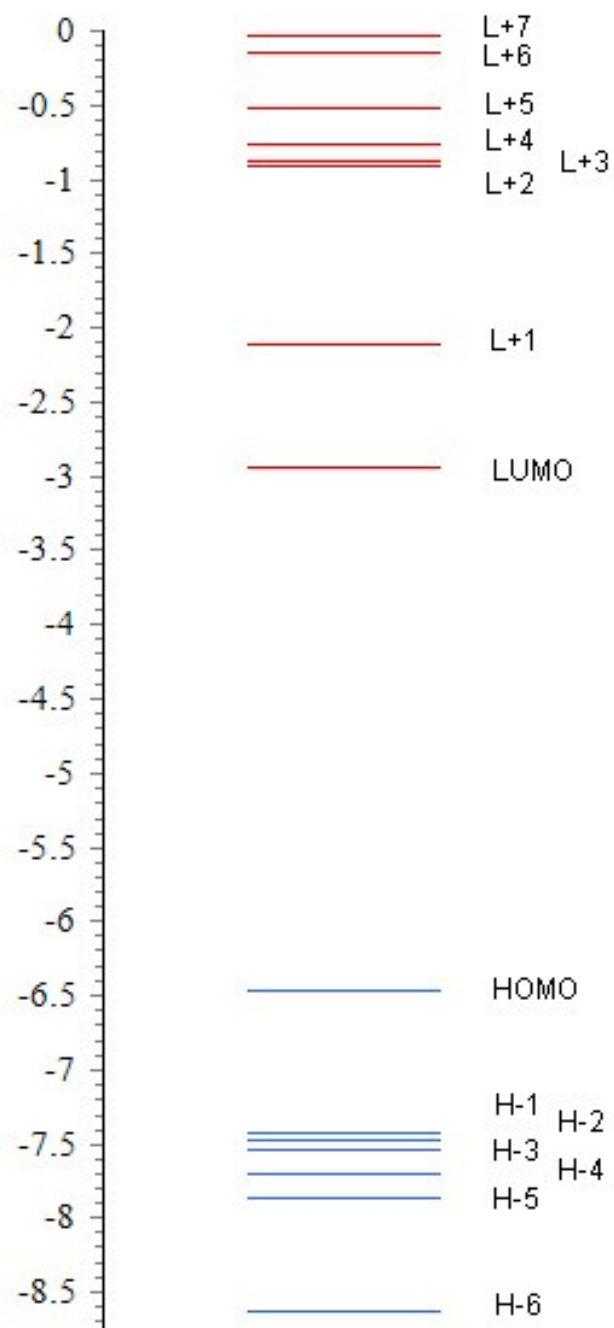

**Fig. S4** Schematic representation of the energy levels of L.

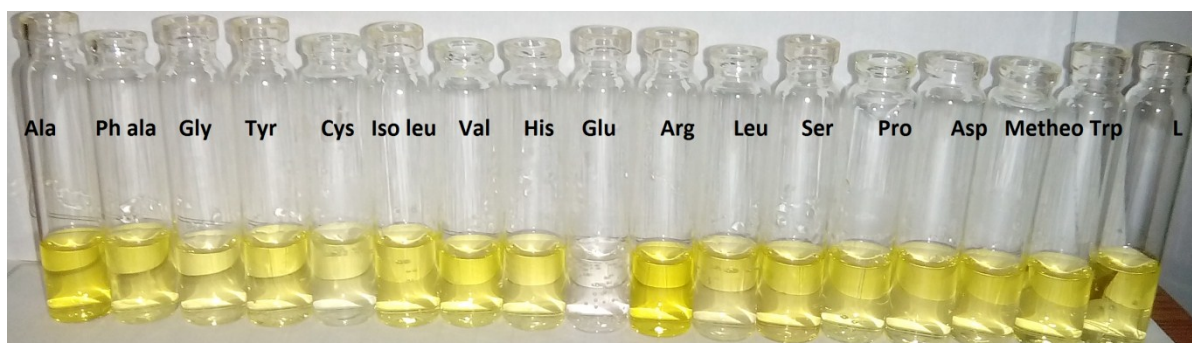

**Fig. S5** The colour changes of L in presence of different amino acids

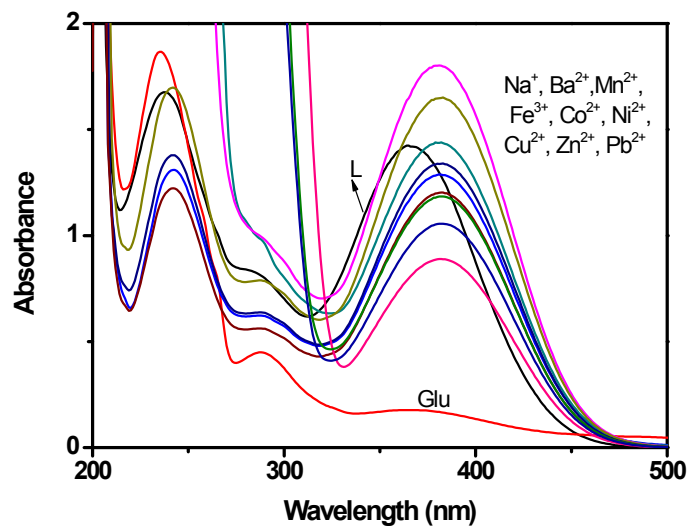

(a)

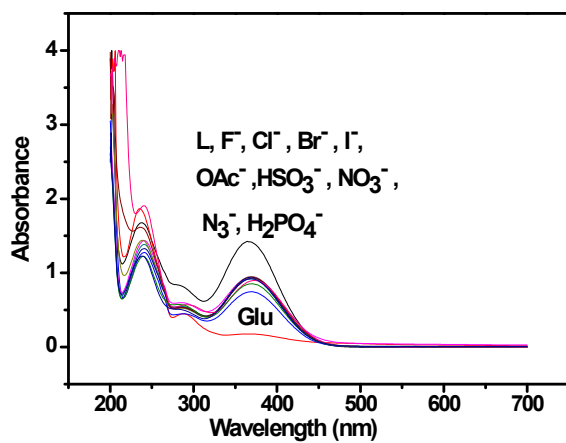

(b)

**Fig. S6** Absorption spectra of **L** (1  $\mu$ M) changes in presence of 10 equiv. of different (a) metal cations and (b) anions

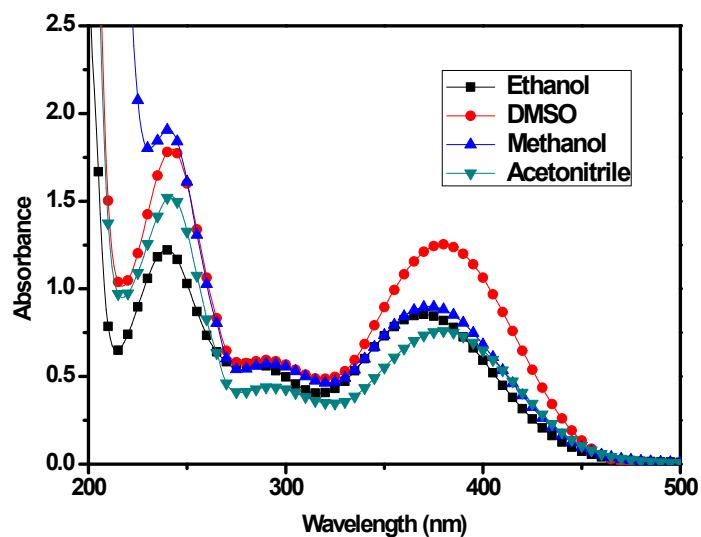

Fig. S7 Absorption behavior of **L** in different solvents

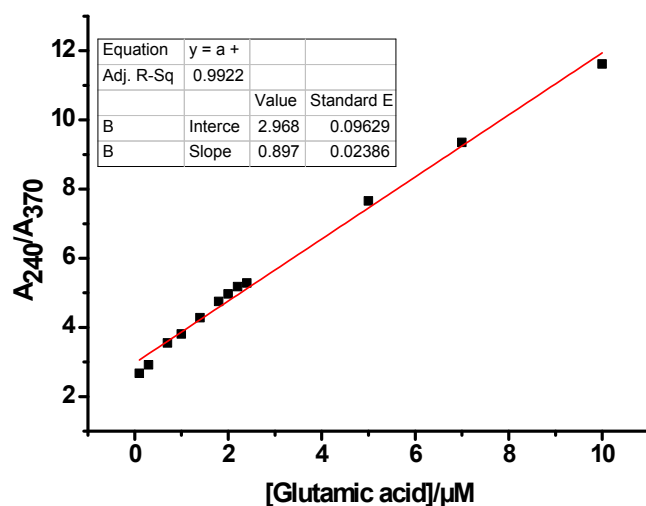

Fig. S8 Detection limit of the chemosensor **L** for glutamic acid

The detection limit DL of the probe for glutamic acid was determined from the following equation<sup>1</sup>:

$$DL = K \cdot Sb1/S$$

Where K = 2 or 3 (we take 3 in this case); Sb1 is the standard deviation of the blank solution;

S is the slope of the calibration curve.

From the graph we get slope, S = 0.8971, and Sb1 value is 0.23818.

Thus using the formula we get the Detection Limit =  $7.96 \times 10^{-7}$  M i.e. the probe can detect glutamic acid in this minimum concentration.

Ref.

1. M. Zhu, M. Yuan, X. Liu, J. Xu, J. Lv, C. Huang, H. Liu, Y. Li, S. Wang and D. Zhu, *Org. Lett.* 2008, **10**, 1481-1484.

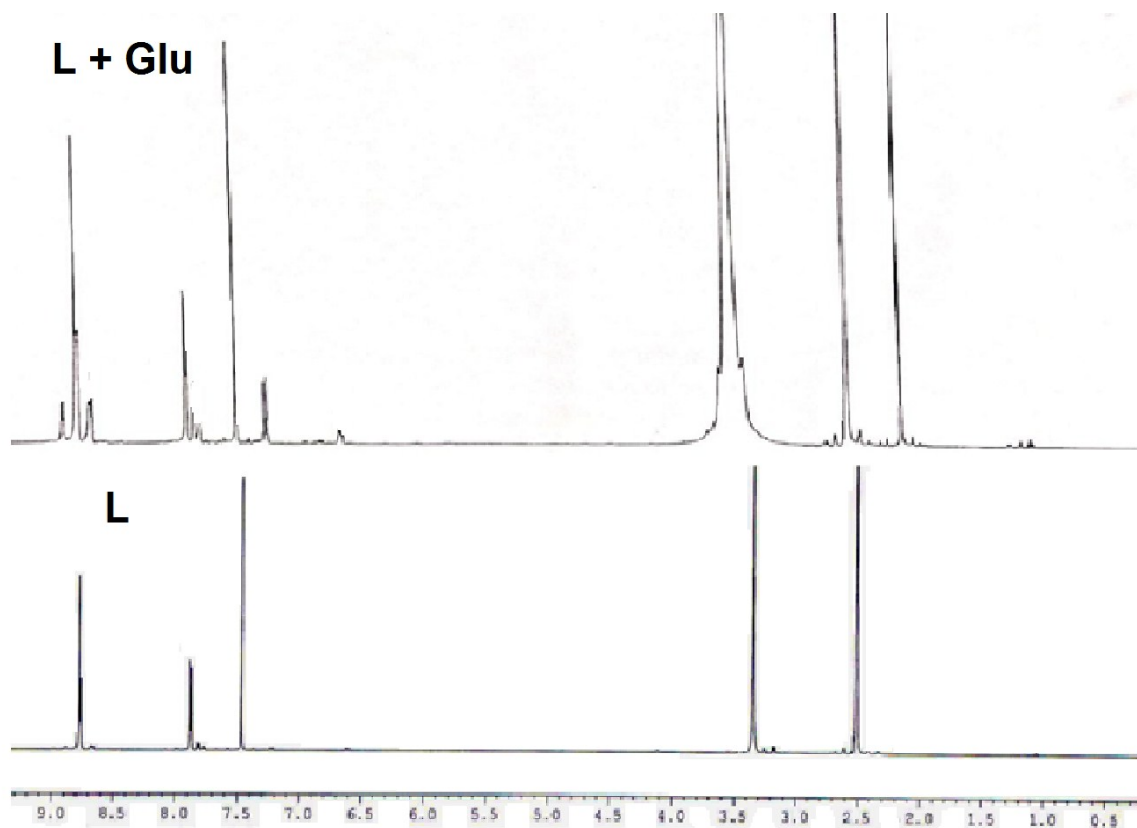

**Fig. S9** <sup>1</sup>H NMR spectra of the probe **L** and **L- Glu** in d<sub>6</sub>-DMSO (in 400 MHz NMR spectrometer).

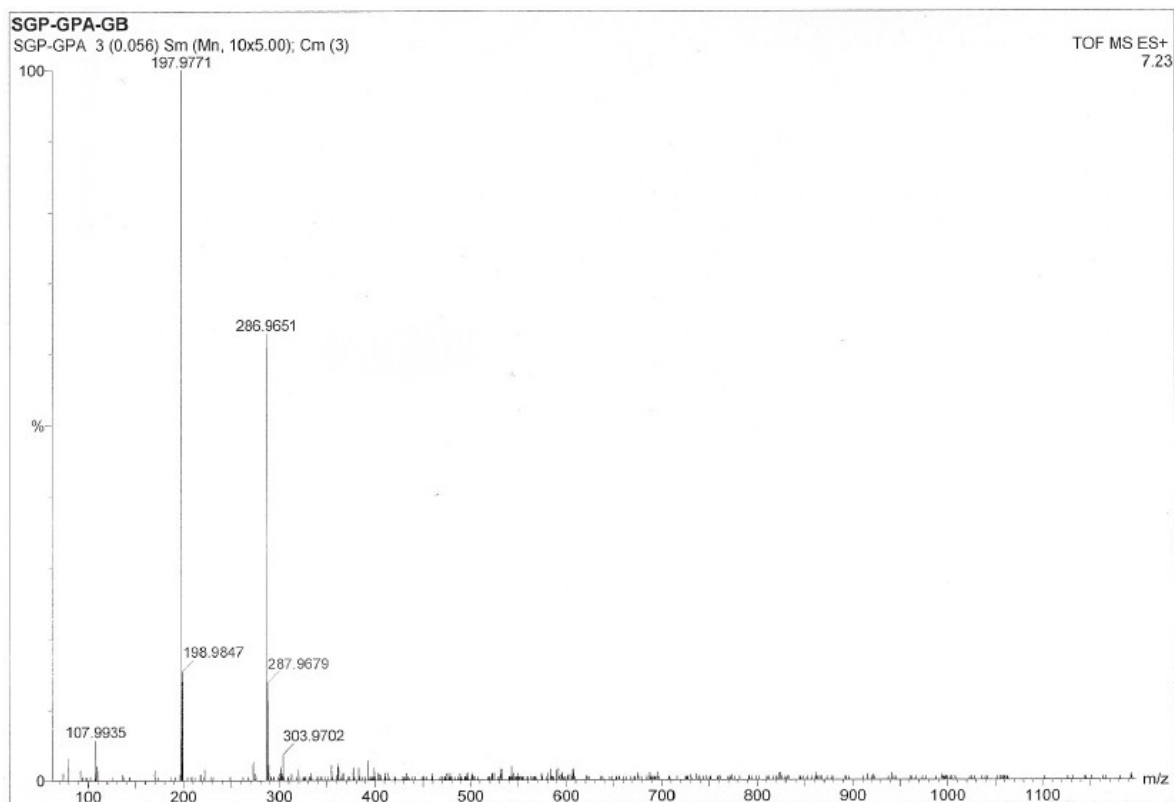

**Fig. S10** HRMS spectra of **L-Glu**.

**Table S1** Selected optimized bond distances (Å) and angles (°) for **L**.

| Bond Length (Å) |         | Bond Angle (°) |           |
|-----------------|---------|----------------|-----------|
| C1-C2           | 1.39226 | C31-N35-C3     | 123.99968 |
| C2-C3           | 1.40971 | N35-C3-C4      | 125.72900 |
| C3-C4           | 1.41146 | C3-C2-C1       | 121.15751 |
| C4-C5           | 1.39219 | C2-C1-C6       | 120.16781 |
| C5-C6           | 1.40957 | C1-C6-C5       | 118.67060 |
| C3-N35          | 1.41658 | C6-C5-C4       | 121.16137 |
| C6-N36          | 1.41644 | C6-N36-C33     | 124.00061 |
| C31-N35         | 1.29209 | N36-C33-C11    | 121.78535 |
| C31-C21         | 1.46748 | C33-C11-C13    | 122.21780 |
| C21-C22         | 1.40737 | C11-C13-C16    | 118.98698 |
| C22-C24         | 1.39841 | C13-C16-N20    | 123.36042 |
| C24-N30         | 1.35268 | C16-N20-C14    | 117.49344 |



|         |         |             |           |
|---------|---------|-------------|-----------|
| N30-C26 | 1.35796 | N20-C14-C12 | 123.03788 |
| C26-C23 | 1.39445 | C14-C12-C11 | 119.27926 |
| C23-C21 | 1.40901 | N35-C31-C21 | 121.78172 |
| N36-C33 | 1.29200 | C31-C21-C22 | 119.94187 |
| C33-C11 | 1.46749 | C21-C22-C24 | 119.28066 |
| C11-C12 | 1.40736 | C22-C24-N30 | 123.03711 |
| C12-C14 | 1.39841 | C24-N30-C26 | 117.49321 |
| C14-N20 | 1.35268 | N30-C26-C23 | 123.36137 |
| N20-C16 | 1.35796 | C26-C23-C21 | 118.98691 |
| C13-C16 | 1.39445 | C23-C21-C31 | 122.21738 |
| C13-C11 | 1.40901 |             |           |

**Table S2** The energy and molar absorption coefficients of experimental absorption bands and the electronic transitions calculated with the TD-DFT method for **L**

| Most important orbital excitations                              | $\lambda$ [nm] | $f$    | Experimental $\lambda$ [nm] ( $\log \epsilon$ ) |
|-----------------------------------------------------------------|----------------|--------|-------------------------------------------------|
| H $\rightarrow$ L                                               | 389.43         | 1.6748 | 370 (6.92)                                      |
| H-2 $\rightarrow$ L, H-1 $\rightarrow$ L+1                      | 325.54         | 0.0041 |                                                 |
| H-5 $\rightarrow$ L                                             | 311.81         | 0.0239 |                                                 |
| H-7 $\rightarrow$ L                                             | 291.21         | 0.0531 | 287(4.44)                                       |
| H-3 $\rightarrow$ L+1, H-4 $\rightarrow$ L                      | 267.17         | 0.0012 |                                                 |
| H-1 $\rightarrow$ L+1, H-2 $\rightarrow$ L                      | 259.38         | 0.0027 |                                                 |
| H $\rightarrow$ L+2, H-6 $\rightarrow$ L+1,                     | 247.73         | 0.0178 |                                                 |
| H $\rightarrow$ L+4, H-6 $\rightarrow$ L+1                      | 242.01         | 0.0460 |                                                 |
| H-9 $\rightarrow$ L, H $\rightarrow$ L+5, H $\rightarrow$ L+2   | 238.37         | 0.207  |                                                 |
| H-6 $\rightarrow$ L+1, H $\rightarrow$ L+4, H $\rightarrow$ L+2 | 235.35         | 0.0333 | 239 (11.76)                                     |
| H-8 $\rightarrow$ L+1, H $\rightarrow$ L+5                      | 230.63         | 0.2503 |                                                 |

|                           |        |        |  |
|---------------------------|--------|--------|--|
| H→L+5, H-9→L              | 218.38 | 0.0417 |  |
| H→L+7                     | 207.96 | 0.0017 |  |
| H-2→L+4, H-2→L+5, H-4→L+5 | 203.31 | 0.0017 |  |
| H-4→L+5, H-2→L+4, H-4→L+4 | 202.76 | 0.0045 |  |

$\epsilon$  – molar absorption coefficient [ $\text{dm}^3 \text{mol}^{-1} \text{cm}^{-1}$ ];  $f$  – oscillator strength; H – highest occupied molecular orbital; L – lowest unoccupied molecular orbital.
